# Supplementary material for: Analysis of the compression of molecular crystal structures using Hirshfeld surfaces
Source: Royal Society of Chemistry journal article supplement (doi:10.1039/b715494a), 2008-01-01
Supplement: b715494a.pdf [file b715494a.pdf]

## Supplementary Materials

**Table S1:** Additional high pressure structures mined from the CSD using the search conditions: high pressure ( $\geq 0.1$  GPa), room temperature, only organic compounds with at least one H or D atom, R-factor  $> 10\%$ , no disorder, must have 3D coordinates. The CSD refcodes are given along with the pressure each crystal structure was collected at, the year of the publication and the first author listed in the publication. The data in the original set of compression studies was also removed to avoid duplication.

| CSD Refcodes                             | No. of CIFs | Compound                                              | Pressure(s) (GPa)                                                         | Reference                              |
|------------------------------------------|-------------|-------------------------------------------------------|---------------------------------------------------------------------------|----------------------------------------|
| ACETAC09                                 | 1           | Acetic Acid                                           | 0.46                                                                      | Dawson, 2004                           |
| BENZEN04, 11                             | 2           | Benzene                                               | 2.5, 0.7                                                                  | Fourme, 1971,<br>Budzianowski,<br>2006 |
| BISMEV04                                 | 1           | Piracetam                                             | 0.4                                                                       | Pulham, 2005                           |
| DATREV01                                 | 1           | bis(Ethylenedithio)-<br>tetrathiafulvalene tri-iodide | 0.95                                                                      | Molchanov,<br>1986                     |
| DCLMET11, 12                             | 2           | Dichloromethane                                       | 0.7                                                                       | Podsiadlo,<br>2005                     |
| FACRIK03, 04                             | 2           | 1,3-Cyclohexanedione                                  | 1.14, 1.9                                                                 | Katrusiak,<br>1990                     |
| FIGYID01                                 | 1           | Cyclopropylamine                                      | 1.2                                                                       | Lozano-Casal,<br>2005                  |
| GLYCIN36, 41,<br>44-47, 50, 61,<br>65-68 | 12          | Glycine                                               | 0.95, 7.1, 5.1,<br>4.38, 3.63, 3.12,<br>1.39, 6.47, 0.5,<br>1.3, 1.9, 4.3 | Boldyreva,<br>2005 &<br>Dawson, 2005   |
| GUHHAS01-03                              | 3           | Chlorotrimethylsilane                                 | 0.23, 0.3, 0.58                                                           | Gajda, 2006                            |
| HEGHUX                                   | 1           | Cyclopentanol                                         | 1.5                                                                       | Moggach,<br>2005a                      |
| KETVEK03                                 | 1           | Cyclobutanol                                          | 1.3                                                                       | McGregor,<br>2005                      |
| LCYSTN24, 25,<br>27                      | 3           | L-Cysteine                                            | 2.6, 4.2, 1.8                                                             | Moggach, 2006                          |
| LSERIN11-16                              | 6           | L-Serine                                              | 0.3, 1.4, 2.9, 4.1,<br>4.8, 5.4                                           | Moggach,<br>2005b                      |
| NAGHOT, 02,<br>03                        | 3           | 2,5-bis(4-Nitrophenyl)-<br>(1,3,4)-oxadiazole         | 2.9, 1.1, 2.0                                                             | Orgzall, 1999                          |
| NAPHTA12                                 | 1           | Naphthalene                                           | 0.51                                                                      | Alt, 1982                              |
| PHENOL11                                 | 1           | Phenol                                                | 0.16                                                                      | Allan, 2002                            |
| PRONAC02                                 | 1           | Propionic Acid                                        | 1.4                                                                       | Allan, 2000                            |
| QAMTUU01                                 | 1           | 3-Fluorophenol                                        | 0.12                                                                      | Oswald, 2005                           |
| QAMVEG01                                 | 1           | 3-Chlorophenol                                        | 0.1                                                                       | Oswald, 2005                           |
| THIOUR19                                 | 1           | Thiourea                                              | 0.97                                                                      | Asahi, 2000                            |
| TTFTCG06                                 | 1           | Tetradeutero-tetrathiafulvene                         | 0.46                                                                      | Filhol, 1981                           |
| WAFNAT                                   | 1           | Paracetamol dihydrate                                 | 1.1                                                                       | Fabbiani, 2004                         |
| WANMUU01                                 | 1           | 2-Chlorophenol                                        | 0.12                                                                      | Oswald, 2005                           |

**Table S2:** PIXEL dimer interaction energies for methane collinear C-H...H-C contact at varying H...H separation. Distances are in Å, energies are in kJ mol<sup>-1</sup>. The energies for each component and the total are rounded to the nearest 0.05 kJ mol<sup>-1</sup>.

| <b>H...H Distance</b> | <b>Coulombic</b> | <b>Dispersion</b> | <b>Repulsion</b> | <b>Polarisation</b> | <b>Total</b> |
|-----------------------|------------------|-------------------|------------------|---------------------|--------------|
| 4.0                   | 0.00             | -0.10             | 0.00             | 0.00                | -0.05        |
| 3.8                   | 0.00             | -0.10             | 0.00             | 0.00                | -0.10        |
| 3.6                   | 0.00             | -0.15             | 0.00             | 0.00                | -0.10        |
| 3.4                   | 0.00             | -0.20             | 0.00             | 0.00                | -0.15        |
| 3.2                   | 0.05             | -0.25             | 0.05             | 0.00                | -0.20        |
| 3.0                   | 0.05             | -0.35             | 0.05             | 0.00                | -0.25        |
| 2.9                   | 0.05             | -0.45             | 0.10             | 0.00                | -0.30        |
| 2.8                   | 0.05             | -0.50             | 0.15             | 0.00                | -0.35        |
| 2.7                   | 0.00             | -0.60             | 0.25             | -0.05               | -0.35        |
| 2.6                   | 0.00             | -0.70             | 0.40             | -0.05               | -0.40        |
| 2.5                   | -0.05            | -0.85             | 0.60             | -0.10               | -0.40        |
| 2.4                   | -0.10            | -1.00             | 0.85             | -0.15               | -0.40        |
| 2.3                   | -0.20            | -1.20             | 1.30             | -0.25               | -0.30        |
| 2.2                   | -0.30            | -1.40             | 1.95             | -0.40               | -0.15        |
| 2.1                   | -0.50            | -1.65             | 2.80             | -0.65               | 0.00         |
| 2.0                   | -0.75            | -1.95             | 3.95             | -0.95               | 0.30         |
| 1.9                   | -1.10            | -2.25             | 6.05             | -1.50               | 1.20         |
| 1.8                   | -1.65            | -2.65             | 8.60             | -2.35               | 2.05         |
| 1.7                   | -2.20            | -3.05             | 12.20            | -3.30               | 3.65         |
| 1.6                   | -3.40            | -3.45             | 16.90            | -5.30               | 4.75         |
